# Supplementary material for: LXR Suppresses Inflammatory Gene Expression and Neutrophil Migration through cis-Repression and Cholesterol Efflux
Source: PubMed Central journal article supplement (PMC6446575; doi:10.1016/j.celrep.2018.11.100), 2018-12-26
Supplement: NIHMS1517595-supplement-1.pdf [file NIHMS1517595-supplement-1.pdf]

Cell Reports, Volume 25

## Supplemental Information

### **LXR Suppresses Inflammatory Gene Expression and Neutrophil Migration through *cis*-Repression and Cholesterol Efflux**

**David G. Thomas, Amanda C. Doran, Panagiotis Fotakis, Marit Westerterp, Per Antonson, Hui Jiang, Xian-Cheng Jiang, Jan-Åke Gustafsson, Ira Tabas, and Alan R. Tall**

Supplemental Figures

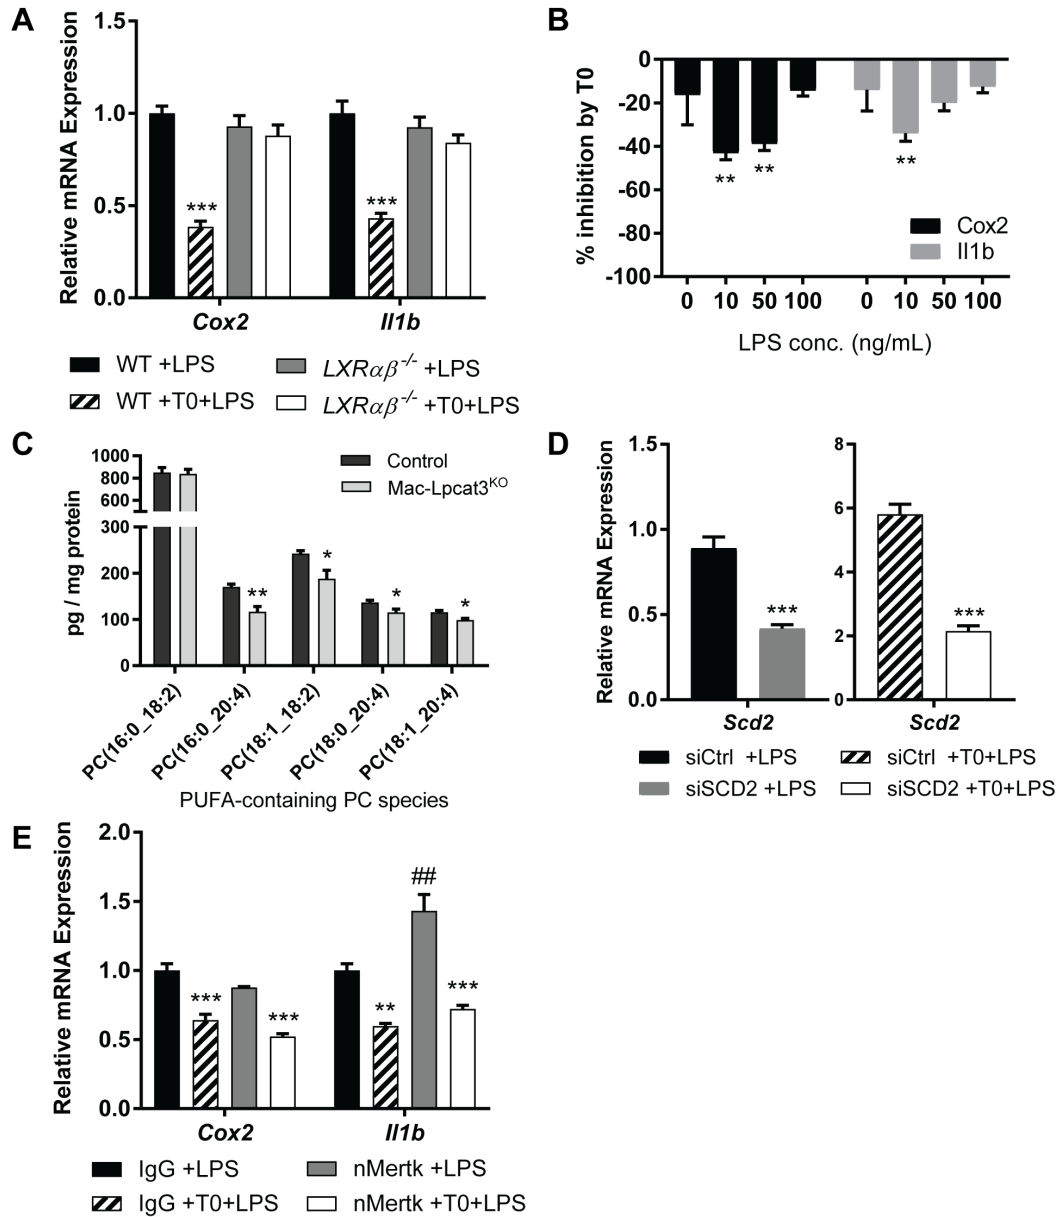

**Figure S1; Related to Figure 1. Specificity and validation of *in vitro* models of LXR repression.** (A) WT or *Nr1h3*<sup>-/-</sup> *Nr1h2*<sup>-/-</sup> (*LXRαβ*<sup>-/-</sup>) BMDM were treated for 3 hours with 500 nM T0 before stimulation with 10 ng/mL LPS for 2 hours. (B) WT BMDM were treated for 3 hours with 500 nM T0 before stimulation with 0, 10, 50, or 100 ng/mL LPS as indicated. (C) Phosphatidylcholine (PC) species of WT and *LysMCre Lpcat3<sup>fl/fl</sup>* (Mac-Lpcat3<sup>KO</sup>) BMDM were measured by infusion-based high-resolution mass spectroscopy. Relative levels of PUFA-containing PC are shown. (D) BMDM were treated for 24 hours with an siRNA Smartpool targeted against SCD2 (siSCD2) or with a nontargeting control Smartpool (siCtrl) and then rested for 24 hours. *Scd2* mRNA expression was determined at the time of experiment 48 hours after transfection. (E) BMDM were pretreated with MERTK neutralizing antibody (nMERTK) or control goat IgG for 3 hours at a concentration of 20 μg/mL and then treated as in (A). mRNA expression was evaluated by qPCR. Mean +/- SEM is plotted. *n* = 4 biological replicates (A-B, D-E) or 5-6 biological replicates (C). Significance was determined by one-way ANOVA with Tukey's post-hoc test (A, E), two-way ANOVA with Sidak's post-hoc test (B), or Student's t-test with Benjamini-Hochberg multiple testing correction (C, D). (\*) *P* < 0.05, (\*\*) *P* < 0.01, (\*\*\*) *P* < 0.001 for T0 treatment vs control. (#) *P* < 0.05, (##) *P* < 0.01, (###) *P* < 0.001 for nMERTK effect vs IgG.

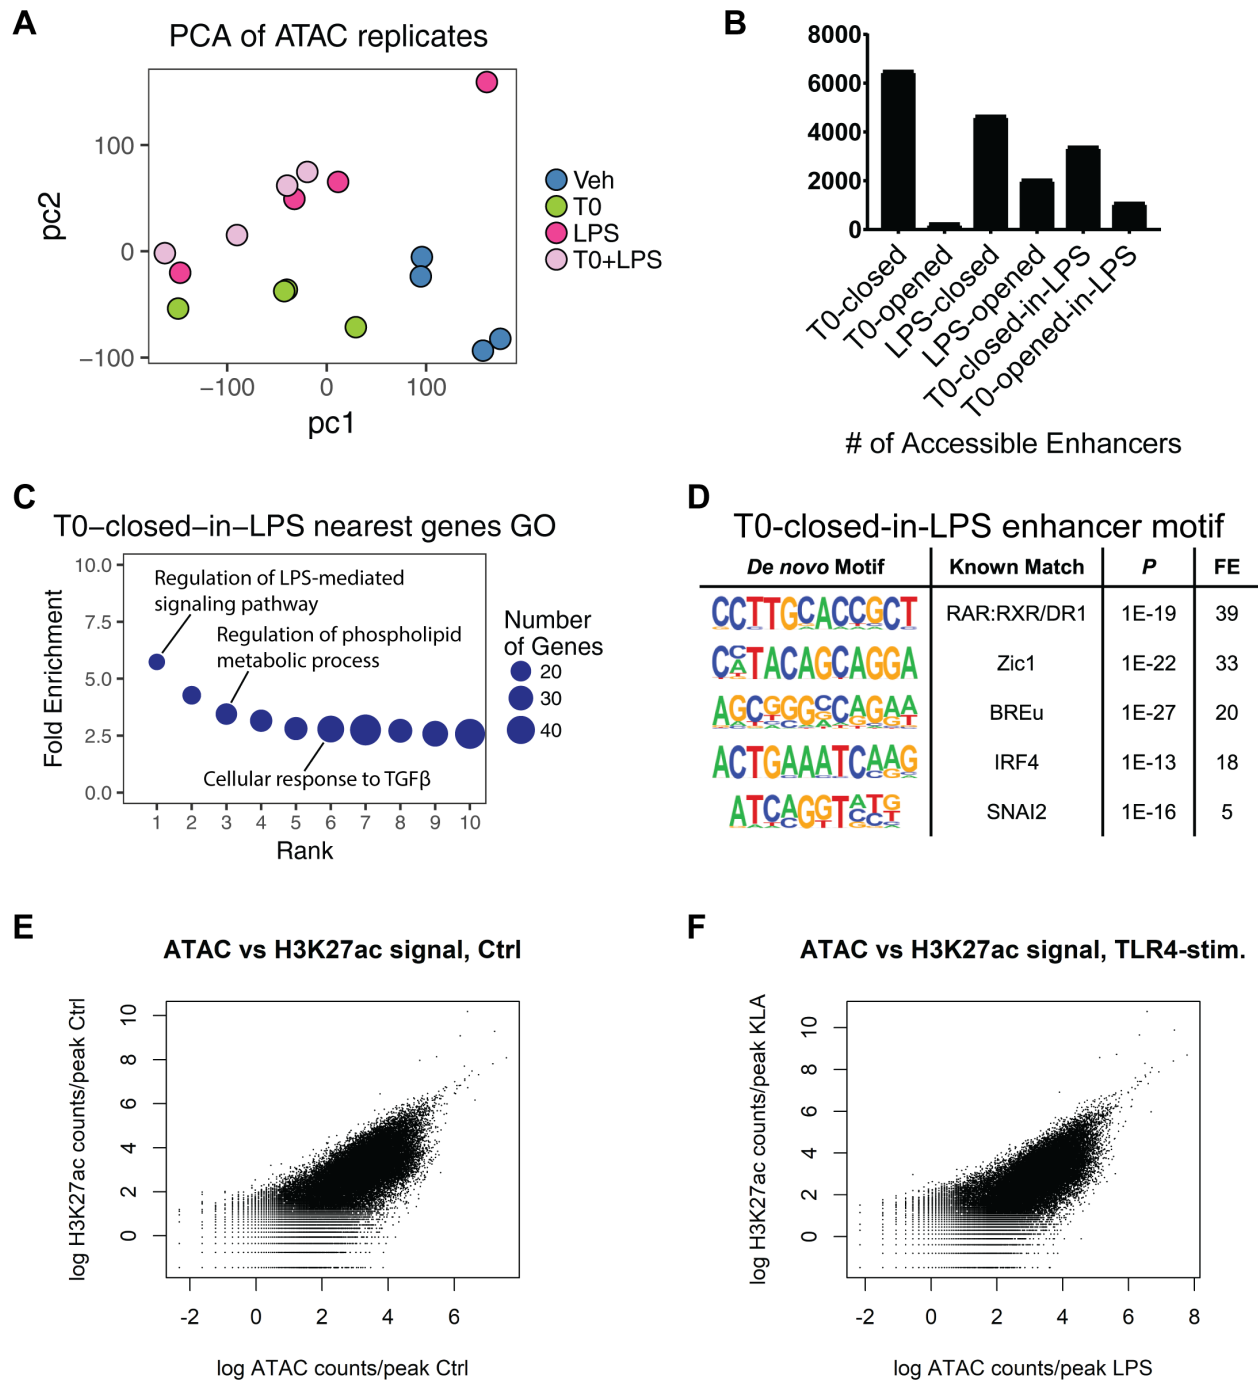

**Figure S2; Related to Figure 2. Characterization of T0-related chromatin changes by ATAC-seq.** (A) PCA analysis of ATAC signal over all macrophage enhancers by replicate. (B) Number of enhancers opened or closed by T0 and LPS treatments. (C) PANTHER GO categories enriched in genes nearest to T0-closed-in-LPS enhancers (Bonferroni-adjusted  $P < 0.05$ ). (D) HOMER *de novo* motifs enriched in T0-closed-in-LPS enhancers ( $P < 1 \times 10^{-12}$ ; top 5 motifs displayed). FE: fold enrichment. (E-F) Correlation of ATAC signal with H3K27ac signal from Oishi et al., 2017 over macrophage enhancers from untreated macrophages (E) or TLR4-stimulated (TLR4-stim.) macrophages (F).  $n = 4$  biological replicates (ATAC-seq) or 1 biological replicate (H3K27ac ChIP-seq).

### A Genome-wide LXR ChIP signal at T0-closed-in-LPS enhancers

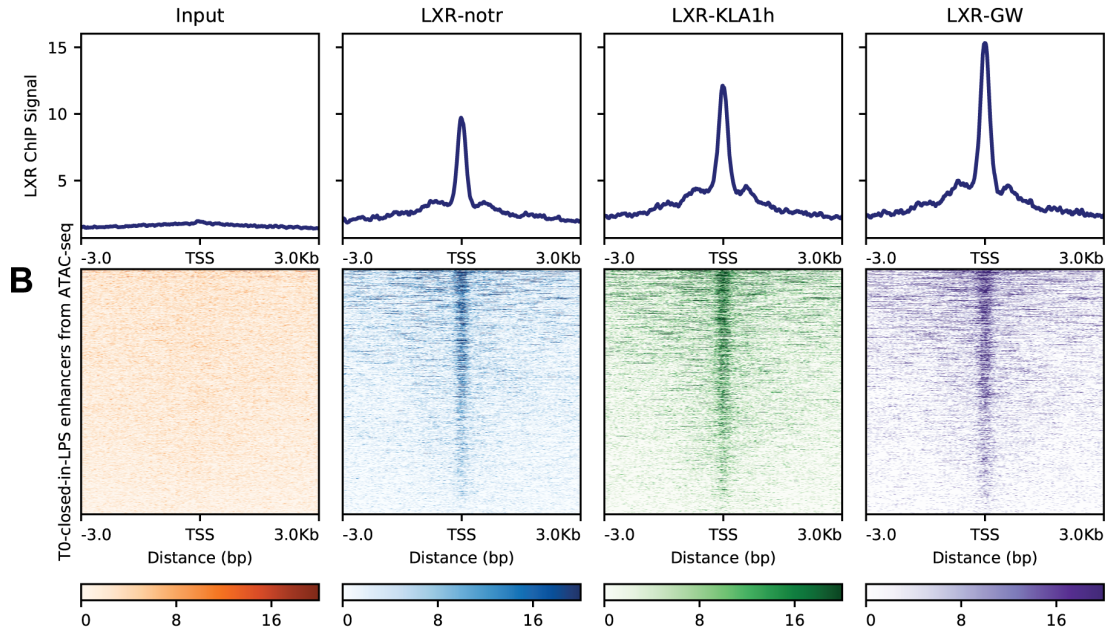

### C Genome-wide LXR ChIP signal at T0-opened enhancers

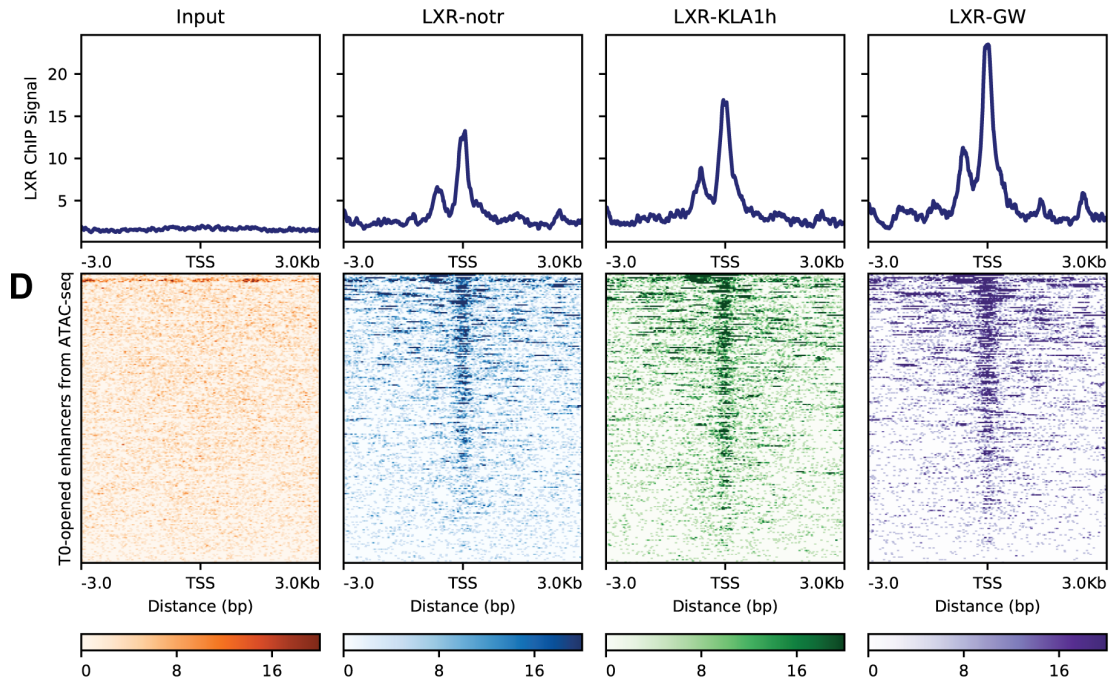

**Figure S3; Related to Figure 3. LXR ChIP signal is present at T0-closed-in-LPS and T0-opened enhancers.** (A) Histogram of LXR ChIP-seq signal from Oishi et al., 2017 centered on T0-closed-in-LPS enhancers. LXR-notr: chromatin from resting thioglycolate-elicited macrophages (TGEM) immunoprecipitated with anti-LXR antibody (notr: no treatment); LXR-KLA1h: chromatin from TGEM stimulated with TLR4 agonist KLA for 1 hour; LXR-GW: chromatin from TGEM treated with LXR agonist GW3965 for 24 hours. (B) Heatmap of LXR ChIP-seq signal as in (A) centered on T0-closed-in-LPS enhancers. (C) Histogram of LXR ChIP-seq signal as in (A) centered on T0-opened enhancers. (D) Heatmap of LXR ChIP-seq signal as in (A) centered on T0-opened enhancers.  $n = 4$  biological replicates (ATAC-seq) or 1 biological replicate (LXR ChIP-seq).

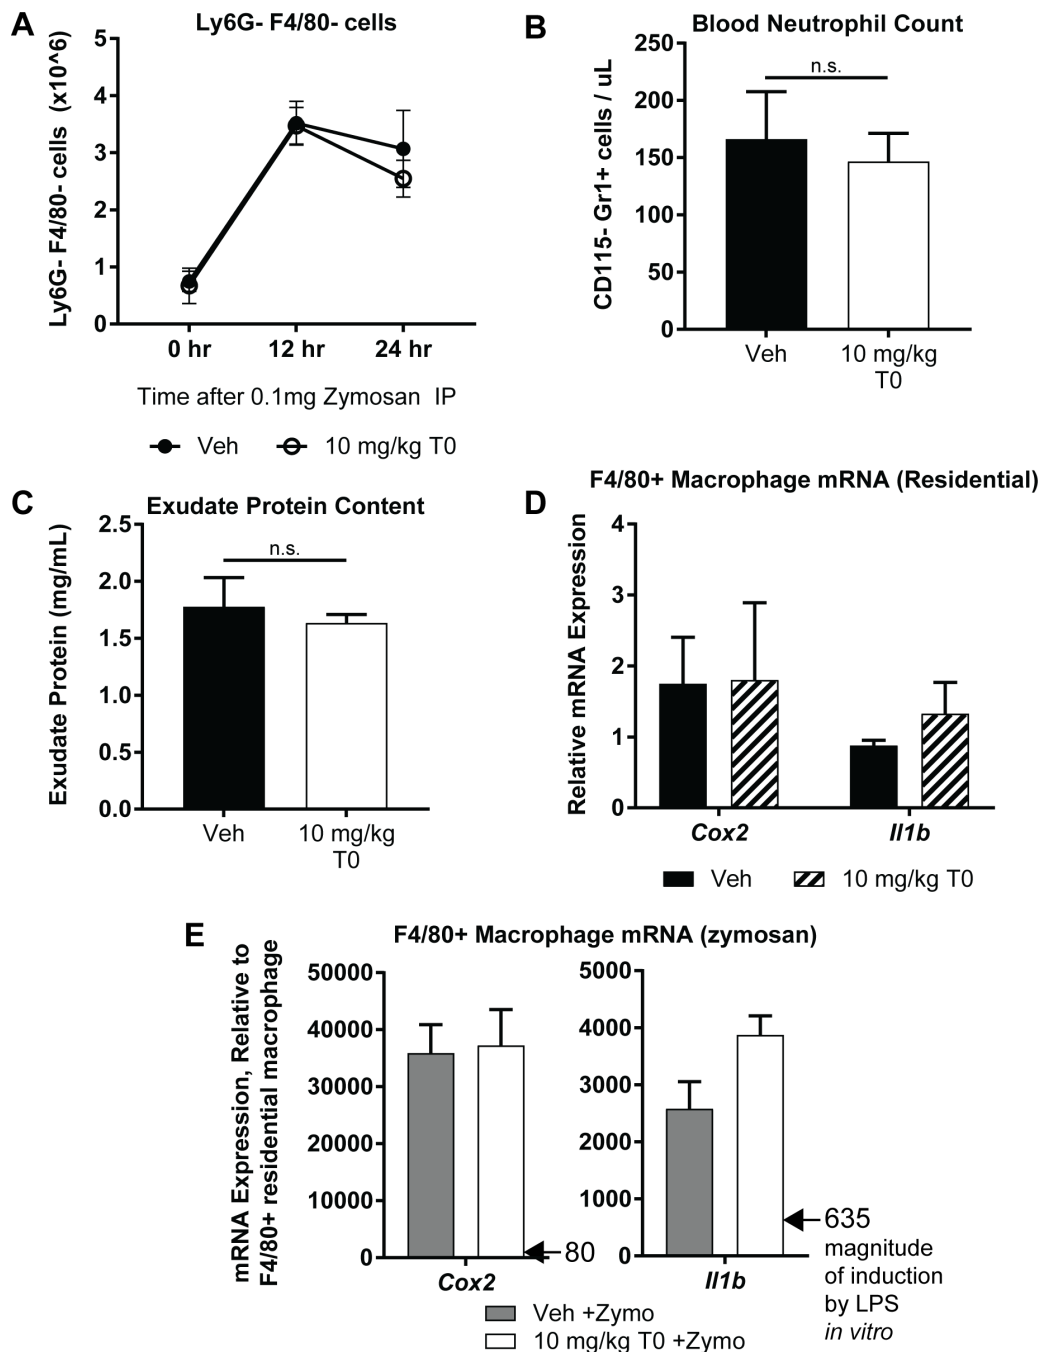

**Figure S4; Related to Figure 6. Effect of T0 on parameters related to zymosan peritonitis severity.** (A) Ly6G-F4/80- cell counts at 0, 12, or 24 hours after zymosan injection were determined by flow cytometry. (B) Circulating neutrophil counts with or without T0 treatment were determined by flow cytometry. (C) Level of exudate protein determined by BCA assay at 2h after zymosan injection. (D) Inflammatory gene expression in resident peritoneal macrophages with or without T0 treatment. (E) Inflammatory gene expression in inflammatory peritoneal macrophages 2h after zymosan injection. Arrows indicate magnitude of induction of each gene by 10 ng/mL LPS *in vitro*.  $n = 4-6$  biological replicates (A-C, E) or 3 biological replicates (D). Significance was determined by two-way ANOVA with Sidak's post-hoc test (A) or by Student's t-test with Benjamini-Hochberg multiple testing correction (B-E). n.s.: not significant.

## Supplemental Tables

**Table S1; Related to Figure 2: ATAC-seq sequencing statistics.** Quality control statistics for ATAC-seq data by condition are provided.

|                                             | <b>Veh</b>  | <b>T0</b>   | <b>LPS</b>  | <b>T0+LPS</b> |
|---------------------------------------------|-------------|-------------|-------------|---------------|
| <b>Replicates</b>                           | 4           | 4           | 4           | 4             |
| <b>Total Reads</b>                          | 166,571,759 | 142,431,581 | 150,110,447 | 142,929,398   |
| <b>Reads Mapped</b>                         | 162,666,895 | 139,857,174 | 146,897,615 | 139,872,799   |
| <b>Unique Reads Mapped</b>                  | 68,804,852  | 67,716,584  | 64,099,577  | 59,297,287    |
| <b>Fr. Reads in Peak (FRiP)</b>             | 0.143       | 0.094       | 0.122       | 0.109         |
| <b>Mean Between-Replicate R<sup>2</sup></b> | 0.972       | 0.974       | 0.973       | 0.983         |

**Table S2; Related to Figure 2: Top 30 GO categories associated with genes nearest to T0-closed enhancers.**  
 Extended list of GO categories associated with genes nearest to T0-closed enhancers with detailed statistics, corresponding to Figure 2C.

| <b>GO biological process complete</b>                                                                     | <b># Genes</b> | <b>Fold Enrichment</b> | <b>Bonferroni -adjusted P</b> |
|-----------------------------------------------------------------------------------------------------------|----------------|------------------------|-------------------------------|
| toll-like receptor signaling pathway (GO:0002224)                                                         | 25             | 3.0                    | 2.4E-02                       |
| negative regulation of peptidyl-tyrosine phosphorylation (GO:0050732)                                     | 27             | 2.8                    | 2.3E-02                       |
| positive regulation of alpha-beta T cell activation (GO:0046635)                                          | 33             | 2.7                    | 4.3E-03                       |
| transforming growth factor beta receptor signaling pathway (GO:0007179)                                   | 37             | 2.6                    | 3.2E-03                       |
| endothelial cell differentiation (GO:0045446)                                                             | 35             | 2.6                    | 6.9E-03                       |
| regulation of phagocytosis (GO:0050764)                                                                   | 40             | 2.6                    | 1.3E-03                       |
| negative regulation of response to wounding (GO:1903035)                                                  | 36             | 2.5                    | 1.5E-02                       |
| positive regulation of GTPase activity (GO:0043547)                                                       | 95             | 2.4                    | 2.8E-10                       |
| negative regulation of T cell activation (GO:0050868)                                                     | 50             | 2.4                    | 6.0E-04                       |
| modification of morphology or physiology of other organism involved in symbiotic interaction (GO:0051817) | 37             | 2.4                    | 2.9E-02                       |
| regulation of cell shape (GO:0008360)                                                                     | 63             | 2.3                    | 1.7E-05                       |
| regulation of smooth muscle cell migration (GO:0014910)                                                   | 36             | 2.3                    | 4.2E-02                       |
| positive regulation of T cell differentiation (GO:0045582)                                                | 39             | 2.3                    | 2.9E-02                       |
| positive regulation of smooth muscle cell proliferation (GO:0048661)                                      | 44             | 2.3                    | 7.3E-03                       |
| cellular response to antibiotic (GO:0071236)                                                              | 40             | 2.3                    | 2.5E-02                       |
| regulation of Rho protein signal transduction (GO:0035023)                                                | 54             | 2.3                    | 6.0E-04                       |
| regulation of leukocyte apoptotic process (GO:2000106)                                                    | 40             | 2.3                    | 3.2E-02                       |
| neural tube closure (GO:0001843)                                                                          | 44             | 2.2                    | 1.5E-02                       |
| myeloid leukocyte differentiation (GO:0002573)                                                            | 43             | 2.2                    | 2.2E-02                       |
| T cell differentiation (GO:0030217)                                                                       | 62             | 2.2                    | 2.0E-04                       |
| negative regulation of protein serine/threonine kinase activity (GO:0071901)                              | 43             | 2.2                    | 2.7E-02                       |
| regulation of gliogenesis (GO:0014013)                                                                    | 54             | 2.2                    | 1.9E-03                       |
| establishment of cell polarity (GO:0030010)                                                               | 46             | 2.2                    | 1.8E-02                       |
| regulation of interleukin-6 production (GO:0032675)                                                       | 52             | 2.2                    | 4.9E-03                       |
| viral process (GO:0016032)                                                                                | 49             | 2.1                    | 1.2E-02                       |
| receptor-mediated endocytosis (GO:0006898)                                                                | 49             | 2.1                    | 1.4E-02                       |
| regulation of plasma membrane bounded cell projection assembly (GO:0120032)                               | 69             | 2.1                    | 1.8E-04                       |
| regulation of I-kappaB kinase/NF-kappaB signaling (GO:0043122)                                            | 57             | 2.1                    | 2.9E-03                       |
| wound healing (GO:0042060)                                                                                | 97             | 2.1                    | 3.7E-07                       |
| positive regulation of leukocyte proliferation (GO:0070665)                                               | 55             | 2.1                    | 6.0E-03                       |

**Table S3; Related to Figure 2: Full list of HOMER motifs for T0-closed enhancers.** Extended list of HOMER categories associated with T0-closed enhancers with detailed statistics, corresponding to Figure 2D.

|           | <i>De novo</i> Motif | Known Match | <i>P</i> | FE  | %Targets | %Background |
|-----------|----------------------|-------------|----------|-----|----------|-------------|
| T0-closed |                      | NR-half     | 1E-19    | 28  | 0.28     | 0.01        |
|           |                      | IRF4        | 1E-22    | 28  | 0.28     | 0.01        |
|           |                      | BCL6B       | 1E-27    | 28  | 0.28     | 0.01        |
|           |                      | THRa/LXRE   | 1E-13    | 19  | 0.19     | 0.01        |
|           |                      | HOXA5       | 1E-16    | 19  | 0.19     | 0.01        |
|           |                      | ZNF416      | 1E-13    | 19  | 0.19     | 0.01        |
|           |                      | AP-1        | 1E-14    | 13  | 0.25     | 0.02        |
|           |                      | ZFP410      | 1E-12    | 11  | 0.22     | 0.02        |
|           |                      | RXR/DR1     | 1E-14    | 9   | 0.36     | 0.04        |
|           |                      | RELA        | 1E-14    | 6   | 0.51     | 0.09        |
|           |                      | Nr4a1       | 1E-12    | 6   | 0.45     | 0.08        |
|           |                      | CTCFL       | 1E-28    | 2   | 3.51     | 1.53        |
|           |                      | TCF1        | 1E-13    | 1.5 | 6.21     | 4.21        |
|           |                      | FOXL1       | 1E-13    | 1.3 | 10.46    | 7.85        |



**Table S4; Related to Figure 2: Top 30 GO categories associated with genes nearest to LPS-opened enhancers.**  
 Extended list of GO categories associated with genes nearest to LPS-opened enhancers with detailed statistics, corresponding to Figure 2E.

| <b>GO biological process complete</b>                                      | <b># Genes</b> | <b>Fold Enrichment</b> | <b>Bonferroni-adjusted P</b> |
|----------------------------------------------------------------------------|----------------|------------------------|------------------------------|
| lipopolysaccharide-mediated signaling pathway (GO:0031663)                 | 12             | 6                      | 9.5E-03                      |
| regulation of p38MAPK cascade (GO:1900744)                                 | 14             | 6                      | 3.6E-03                      |
| regulation of CD4-positive, alpha-beta T cell differentiation (GO:0043370) | 15             | 5                      | 1.5E-02                      |
| heart valve development (GO:0003170)                                       | 17             | 4                      | 5.8E-03                      |
| negative regulation of smooth muscle cell proliferation (GO:0048662)       | 15             | 4                      | 4.8E-02                      |
| positive regulation of T cell differentiation (GO:0045582)                 | 26             | 4                      | 2.8E-05                      |
| alpha-beta T cell activation (GO:0046631)                                  | 18             | 4                      | 1.8E-02                      |
| positive regulation of alpha-beta T cell activation (GO:0046635)           | 17             | 4                      | 4.0E-02                      |
| endothelial cell differentiation (GO:0045446)                              | 19             | 4                      | 1.2E-02                      |
| regulation of cell junction assembly (GO:1901888)                          | 20             | 4                      | 7.8E-03                      |
| T cell activation involved in immune response (GO:0002286)                 | 18             | 4                      | 3.2E-02                      |
| activation of innate immune response (GO:0002218)                          | 19             | 4                      | 1.7E-02                      |
| myeloid leukocyte differentiation (GO:0002573)                             | 26             | 4                      | 3.6E-04                      |
| positive regulation of histone modification (GO:0031058)                   | 23             | 4                      | 2.2E-03                      |
| cytokine production (GO:0001816)                                           | 36             | 4                      | 2.1E-06                      |
| regulation of Rho protein signal transduction (GO:0035023)                 | 30             | 3                      | 1.3E-04                      |
| positive regulation of smooth muscle cell proliferation (GO:0048661)       | 24             | 3                      | 4.1E-03                      |
| positive regulation of myeloid cell differentiation (GO:0045639)           | 21             | 3                      | 2.9E-02                      |
| regulation of interferon-gamma production (GO:0032649)                     | 23             | 3                      | 1.0E-02                      |
| positive regulation of cytokine secretion (GO:0050715)                     | 30             | 3                      | 3.5E-04                      |
| response to transforming growth factor beta (GO:0071559)                   | 27             | 3                      | 1.8E-03                      |
| regulation of leukocyte apoptotic process (GO:2000106)                     | 21             | 3                      | 4.7E-02                      |
| protein dephosphorylation (GO:0006470)                                     | 35             | 3                      | 4.5E-05                      |
| T cell differentiation (GO:0030217)                                        | 33             | 3                      | 1.5E-04                      |
| cellular response to tumor necrosis factor (GO:0071356)                    | 24             | 3                      | 1.4E-02                      |
| negative regulation of cell-cell adhesion (GO:0022408)                     | 38             | 3                      | 1.6E-05                      |
| positive regulation of autophagy (GO:0010508)                              | 22             | 3                      | 4.0E-02                      |
| dendrite development (GO:0016358)                                          | 25             | 3                      | 1.6E-02                      |
| negative regulation of protein secretion (GO:0050709)                      | 28             | 3                      | 4.3E-03                      |
| MAPK cascade (GO:0000165)                                                  | 31             | 3                      | 1.1E-03                      |

**Table S5; Related to Figure 2: Full list of HOMER motifs for LPS-opened enhancers.** Extended list of HOMER categories associated with LPS-opened enhancers with detailed statistics, corresponding to Figure 2F.

|            | <i>De novo</i> Motif                                                              | Known Match  | <i>P</i> | FE | %Targets | %Background |
|------------|-----------------------------------------------------------------------------------|--------------|----------|----|----------|-------------|
| LPS-opened |  | SpiB/ETS     | 1E-13    | 21 | 0.64     | 0.03        |
|            |  | ATF2/Jun     | 1E-13    | 15 | 0.74     | 0.05        |
|            |  | NFkB-p65 (1) | 1E-24    | 4  | 3.76     | 0.86        |
|            |  | NFkB-p65 (2) | 1E-162   | 4  | 25.25    | 6.26        |
|            |  | POU2F2/POU   | 1E-30    | 3  | 7.57     | 2.59        |
|            |  | CEBPa        | 1E-12    | 3  | 3.02     | 1.05        |
|            |  | IRF1         | 1E-19    | 3  | 5.79     | 2.19        |
|            |  | Rbpj1        | 1E-19    | 2  | 11.44    | 6.07        |

**Table S6; Related to Figure 5: Top 30 GO categories associated with T0-repressed genes.** Extended list of GO categories associated with T0-repressed genes with detailed statistics, corresponding to Figure 5B.

| <b>GO biological process complete</b>                                         | <b># Genes</b> | <b>Fold Enrichment</b> | <b>Bonferroni -adjusted P</b> |
|-------------------------------------------------------------------------------|----------------|------------------------|-------------------------------|
| positive regulation of T-helper cell differentiation (GO:0045624)             | 5              | 22.2                   | 3.3E-02                       |
| regulation of p38MAPK cascade (GO:1900744)                                    | 6              | 15.1                   | 3.1E-02                       |
| leukocyte cell-cell adhesion (GO:0007159)                                     | 7              | 13.6                   | 9.6E-03                       |
| regulation of nitric oxide biosynthetic process (GO:0045428)                  | 8              | 12.0                   | 4.1E-03                       |
| cellular response to chemokine (GO:1990869)                                   | 7              | 11.4                   | 3.0E-02                       |
| regulation of interleukin-2 production (GO:0032663)                           | 7              | 11.4                   | 3.0E-02                       |
| negative regulation of cytokine secretion (GO:0050710)                        | 7              | 11.1                   | 3.7E-02                       |
| cellular response to carbohydrate stimulus (GO:0071322)                       | 7              | 10.9                   | 4.1E-02                       |
| positive regulation of T cell mediated immunity (GO:0002711)                  | 8              | 10.5                   | 1.1E-02                       |
| endothelium development (GO:0003158)                                          | 9              | 10.1                   | 3.3E-03                       |
| positive regulation of reactive oxygen species metabolic process (GO:2000379) | 10             | 9.0                    | 2.0E-03                       |
| granulocyte chemotaxis (GO:0071621)                                           | 8              | 9.0                    | 3.5E-02                       |
| positive regulation of myeloid cell differentiation (GO:0045639)              | 9              | 8.9                    | 9.1E-03                       |
| positive regulation of NF-kappaB transcription factor activity (GO:0051092)   | 11             | 8.4                    | 1.0E-03                       |
| positive regulation of angiogenesis (GO:0045766)                              | 15             | 8.1                    | 8.1E-06                       |
| positive regulation of lymphocyte proliferation (GO:0050671)                  | 11             | 7.5                    | 3.0E-03                       |
| regulation of response to biotic stimulus (GO:0002831)                        | 11             | 7.4                    | 3.7E-03                       |
| positive regulation of leukocyte migration (GO:0002687)                       | 10             | 7.0                    | 2.0E-02                       |
| cellular response to lipopolysaccharide (GO:0071222)                          | 14             | 6.8                    | 2.9E-04                       |
| regulation of inflammatory response (GO:0050727)                              | 19             | 5.8                    | 1.4E-05                       |
| peptidyl-serine modification (GO:0018209)                                     | 11             | 5.6                    | 4.9E-02                       |
| inflammatory response (GO:0006954)                                            | 25             | 5.6                    | 6.4E-08                       |
| epithelial cell development (GO:0002064)                                      | 12             | 5.4                    | 2.9E-02                       |
| negative regulation of response to external stimulus (GO:0032102)             | 17             | 5.1                    | 5.9E-04                       |
| cytokine-mediated signaling pathway (GO:0019221)                              | 13             | 5.0                    | 2.5E-02                       |
| negative regulation of transferase activity (GO:0051348)                      | 13             | 5.0                    | 2.5E-02                       |
| regulation of multi-organism process (GO:0043900)                             | 20             | 4.8                    | 9.1E-05                       |
| negative regulation of cell adhesion (GO:0007162)                             | 14             | 4.8                    | 1.7E-02                       |
| wound healing (GO:0042060)                                                    | 13             | 4.8                    | 4.0E-02                       |
| regulation of MAP kinase activity (GO:0043405)                                | 15             | 4.8                    | 7.3E-03                       |
